# Supplementary material for: Population pharmacokinetic analysis and dosing optimization of polymyxin B in critically ill patients
Source: Frontiers journal article supplement (doi:10.3389/fphar.2023.1122310), 2023-03-29
Supplement: Presentation_1.pdf [file Presentation_1.pdf]

## Supplementary Material

### Supplementary Figures

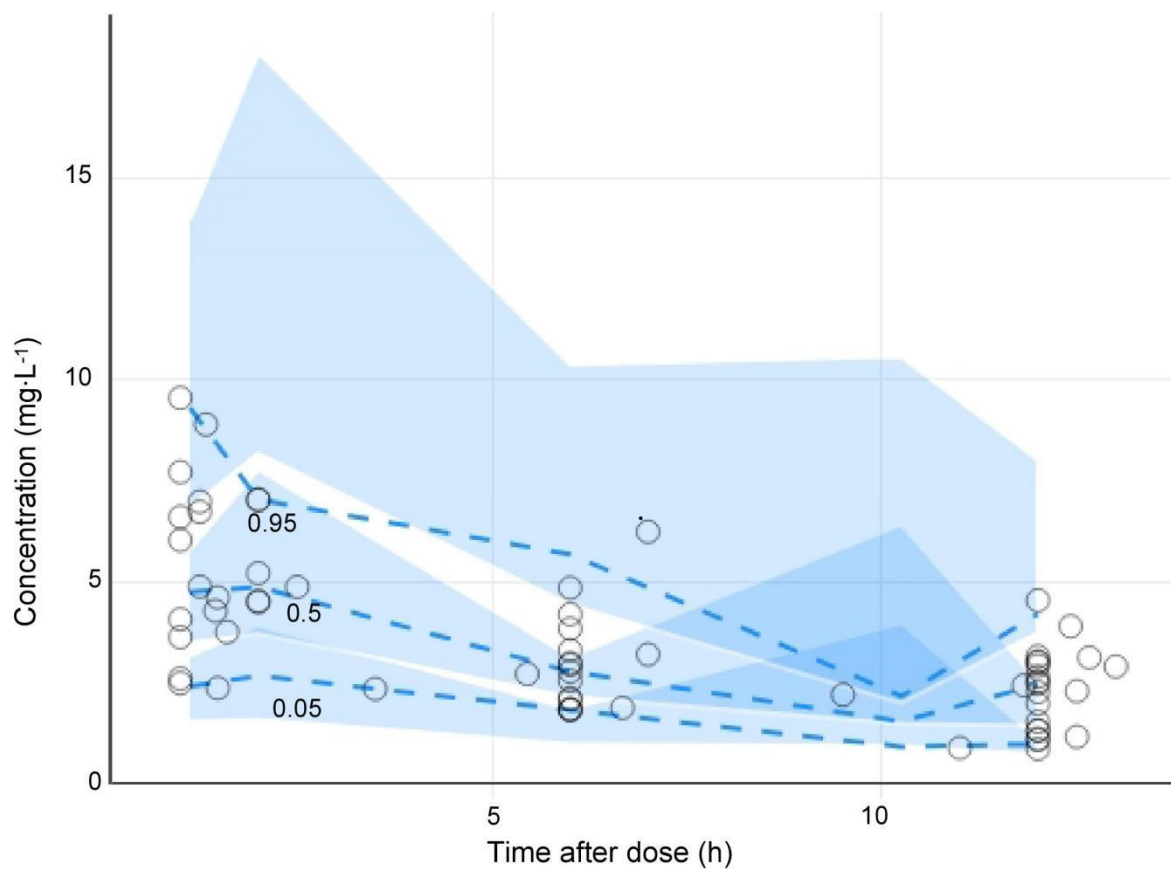

**Figure S1.** Visual predictive check for the final model. Open circles represent observed data. The lines represent the 5th, 50th and 95th percentiles based on simulations of the pharmacokinetic model. The shaded areas represent the 95% confidence intervals corresponding to the percentiles of the simulated data ( $n = 1000$ ).
